# Supplementary material for: Disentangling the chemistry and transport impacts of the quasi-biennial oscillation on stratospheric ozone
Source: Copernicus journal article supplement (doi:10.5194/acp-25-9315-2025), 2025-08-27
Supplement: Supplementary file 1 [file acp-25-9315-2025-supplement.pdf]

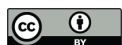

*Supplement of*

## **Disentangling the chemistry and transport impacts of the quasi-biennial oscillation on stratospheric ozone**

**Jinbo Xie et al.**

*Correspondence to:* Jinbo Xie ([jinbo.xie@princeton.edu](mailto:jinbo.xie@princeton.edu))

The copyright of individual parts of the supplement might differ from the article licence.

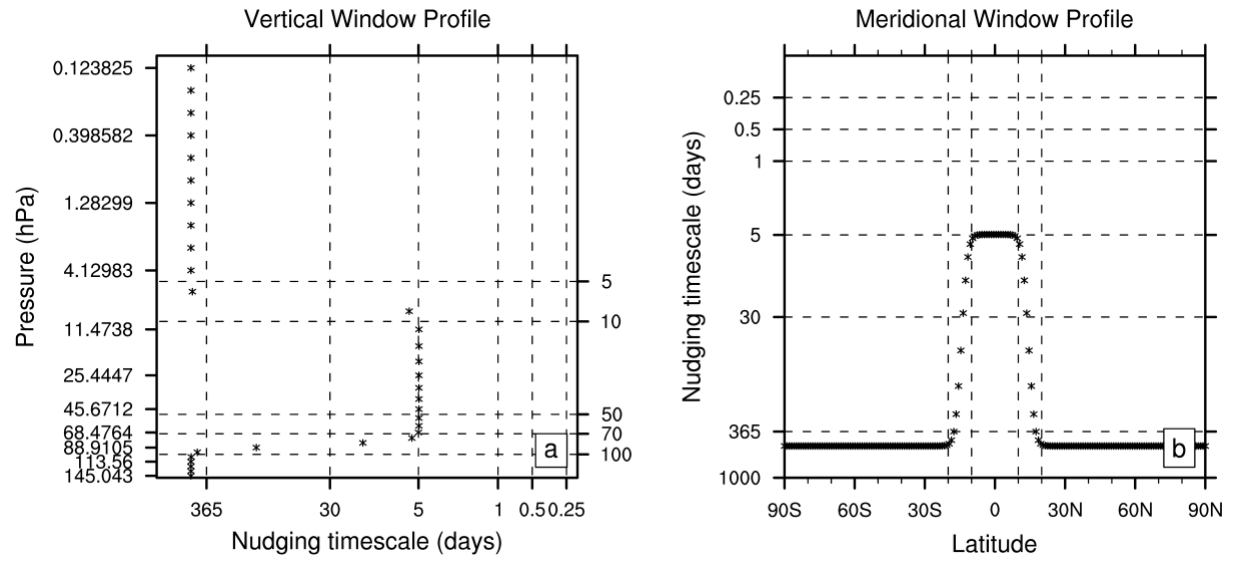

Figure S1 Spatial dependence of nudging timescale in the (a) vertical and (b) meridional directions for E3SMv2.

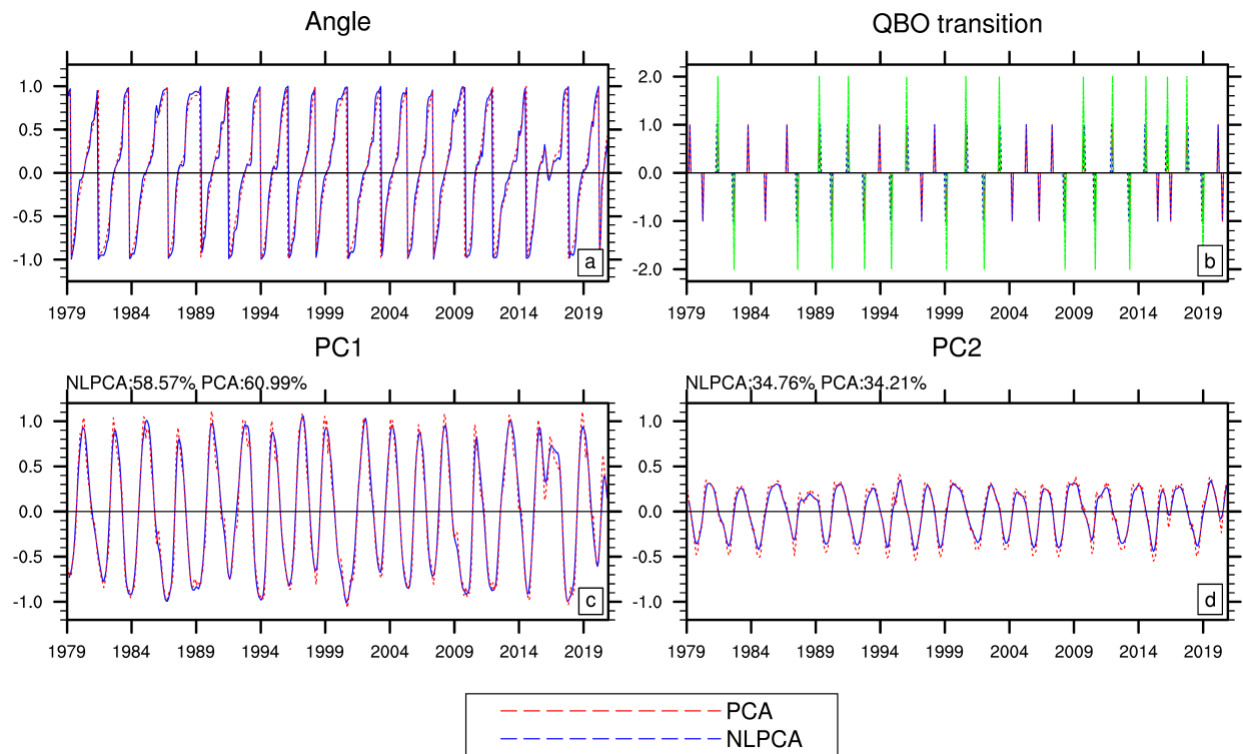

Figure S2 (a) normalized QBO phase angle derived from NLPCA/PCA (red/blue), and (b) NLPCA/PCA representation of the QBO phase transition (1 denotes QBOw->QBOe, -1 denotes QBOe->QBOw, green denotes regions where NLPCA/PCA-derived QBO transition is different), (c) mode 1 and (d) mode 2 principal component. The angle is normalized by  $\pi$ , and 0 and 1 indicate QBO phase transitions (QBOe -> QBOw or QBOw -> QBOe). For showing purpose, PCA1 and PCA2 are divided by 1500 and 1000, respectively.

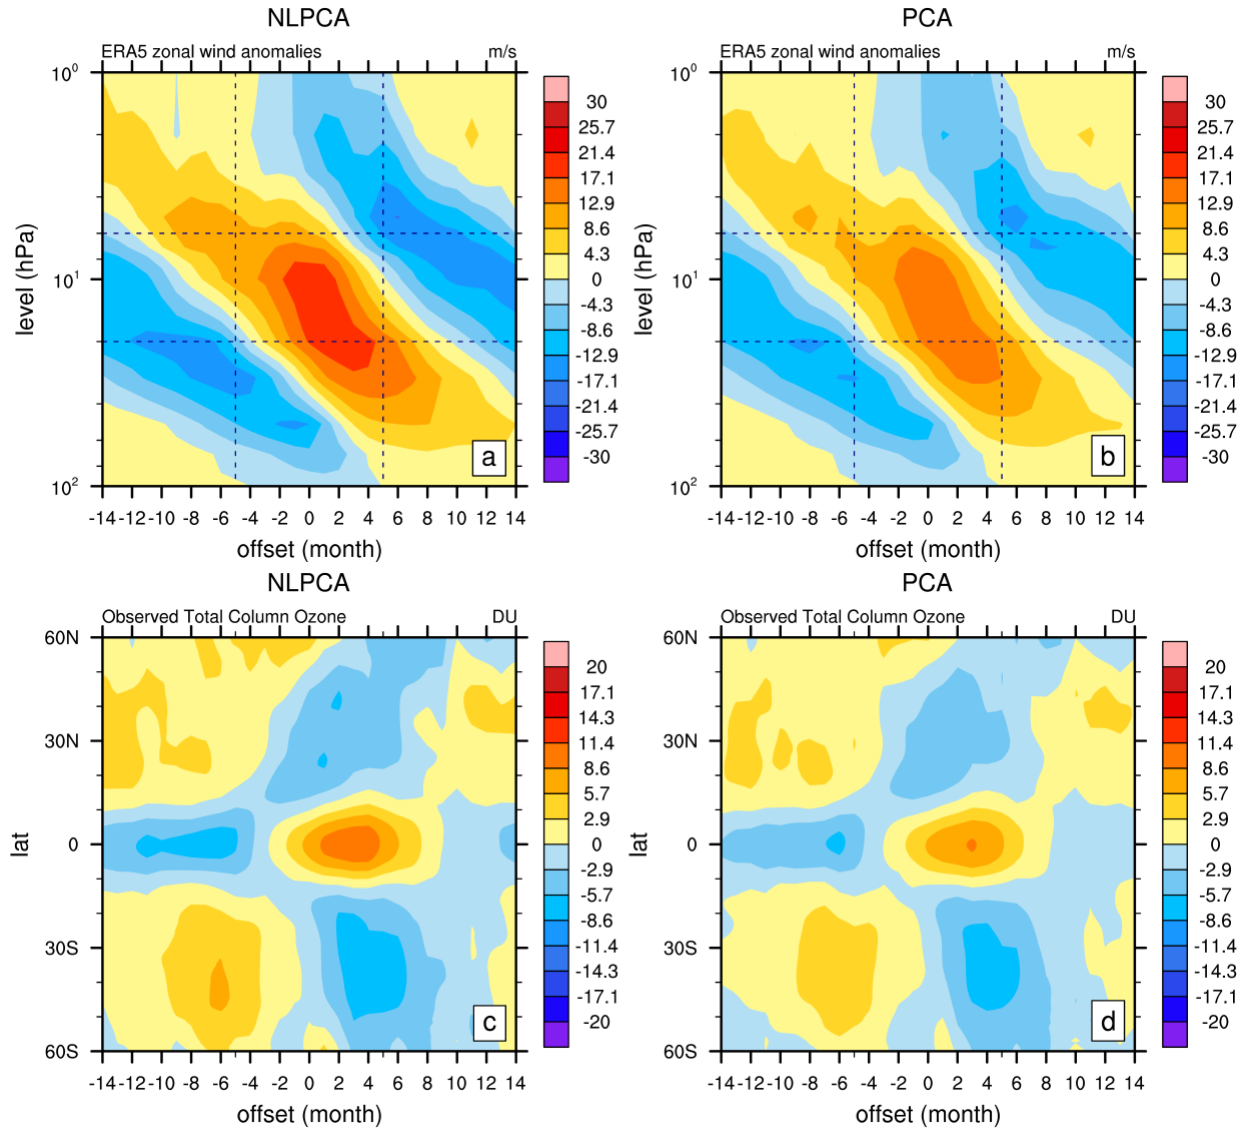

Figure S3 ERA5 tropical zonal wind anomalies (15S-15N, m/s) for 1979-2020 and observed total column ozone (DU) as a function of QBO phase based on index derived from (a, c) NLP, (b, d) PCA.

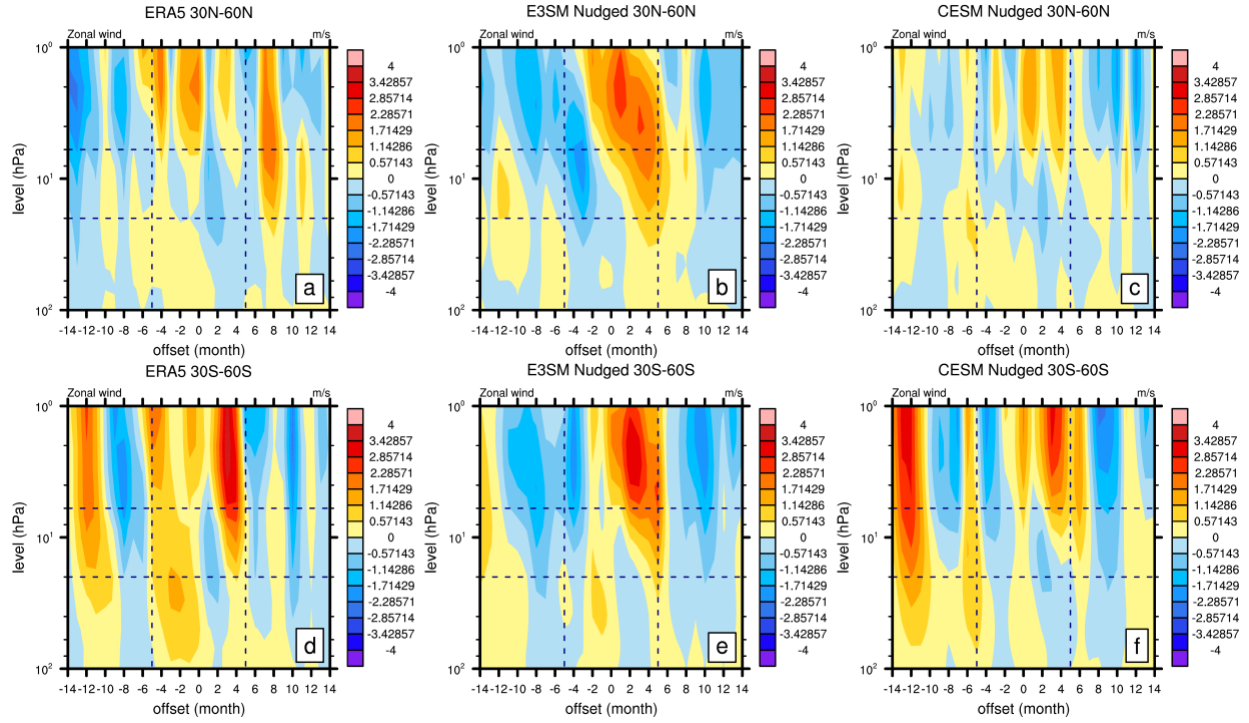

Figure S4 Pressure-time cross-section of the extratropical (30°N-60°N/30°S-60°S) zonal wind (m/s) as function of QBO for (a, d) ERA5, (b, e) E3SMv2 nudged, (c, f) CESM2 nudged for 1979-2020. 0 is centered on the month when QBO index shifts from QBO<sub>e</sub> to QBO<sub>w</sub> (determined by when current QBO index < 0 and next QBO index > 0). The QBO phase is determined by 5S-5N average of the zonal wind.

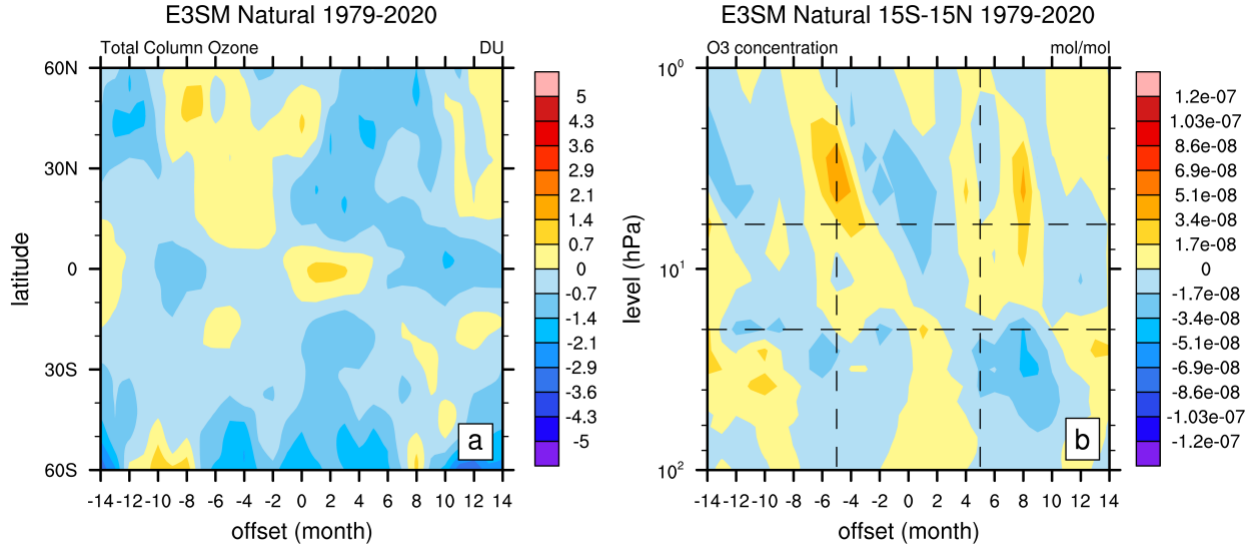

Figure S5 (a) Total column ozone (TCO, Dobson Unit) anomaly (relative to 1979-2020 mean) and (b) pressure-time cross-section of the tropical (15°S-15°N) anomalous ozone concentration (mol/mol) as function of QBO phase (determined by NLPKA QBO index) for E3SMv2 natural simulation for 1979-2020. 0 is centered on the month when QBO index shifts from QBOe to QBOw (determined by when current QBO index < 0 and next QBO index > 0). The QBO phase is determined by 5S-5N average of the zonal wind.

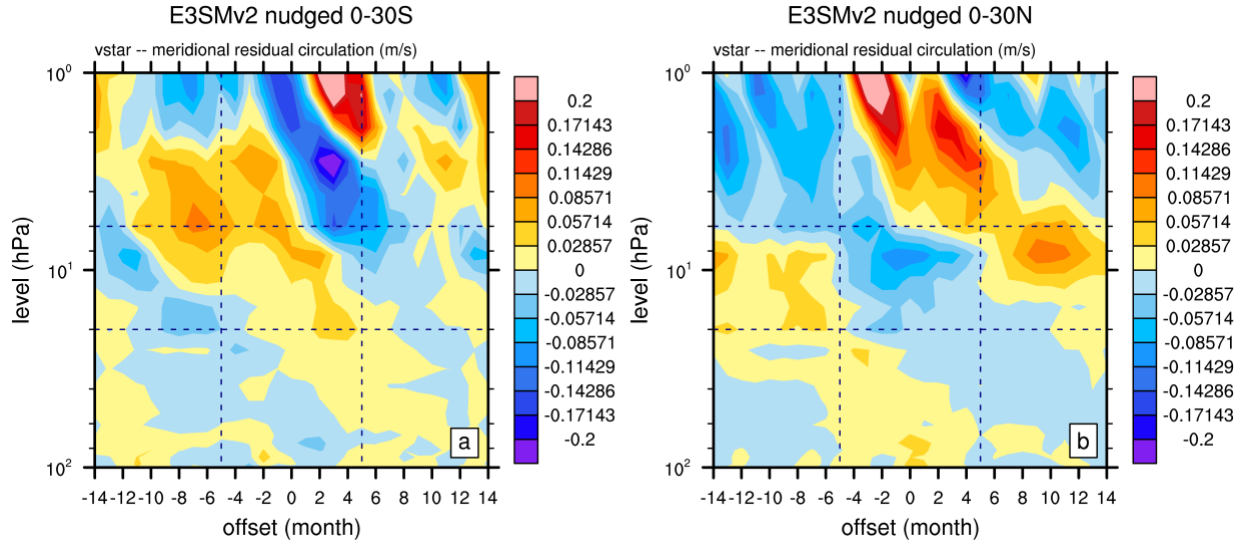

Figure S6 Pressure-time cross-section of the northern and southern hemisphere ( $0^{\circ}$ - $30^{\circ}$ N/ $0^{\circ}$ - $30^{\circ}$ S) anomalous transformed eulerian mean  $v^*$  (m/s) as function of QBO phase (determined by NLPCA QBO index) for E3SMv2 nudged simulation for 1979-2020. 0 is centered on the month when QBO index shifts from QBOe to QBOw (determined by when current QBO index  $< 0$  and next QBO index  $> 0$ ). The QBO phase is determined by 5S-5N average of the zonal wind.

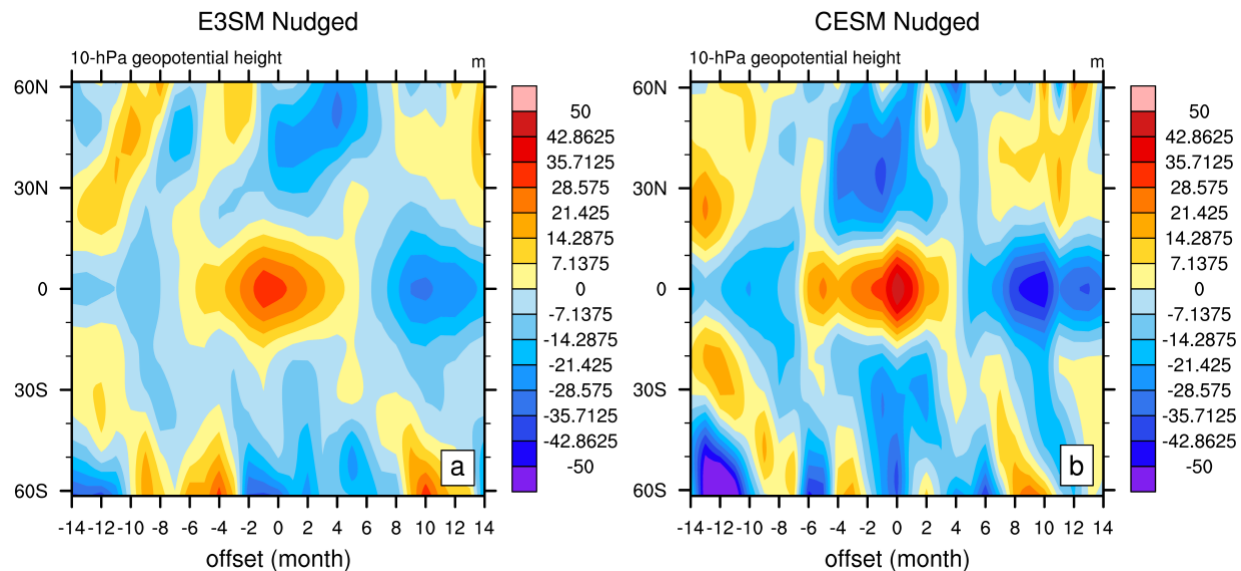

Figure S7 10-hPa geopotential height (m) for (a) E3SMv2 Nudged, (b) CESM2 Nudged. 0 is centered on the month when QBO transits from QBOe to QBOw (determined by when current QBO index < 0 and next QBO index > 0). The QBO phase is determined by 5S-5N average of the zonal wind.



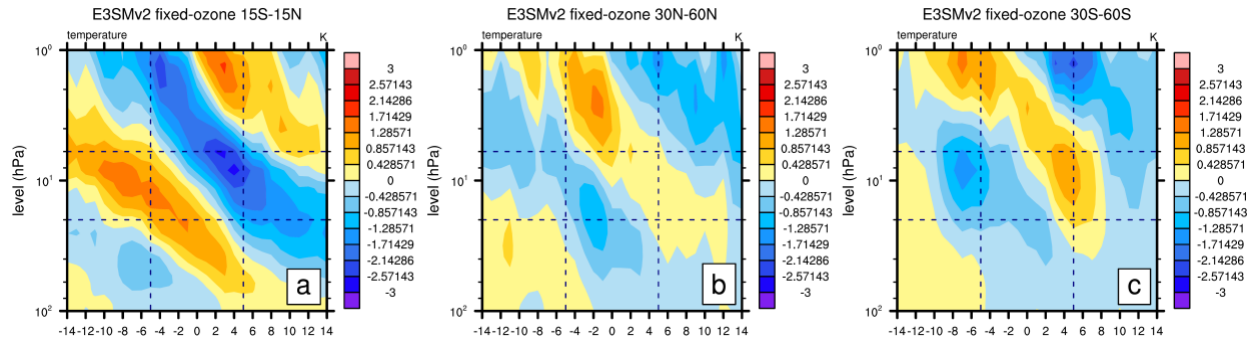

Figure S8 Pressure-time cross-section of the tropical/extratropical (15°S-15°N/30°N-60°N/30°S-60°S) 1979-2020 temperature (K) as function of QBO for (a, b, c) E3SMv2 fixed-ozone. 0 is centered on the month when QBO index shifts from QBOe to QBOw (determined by when current QBO index < 0 and next QBO index > 0). The QBO phase is determined by 5S-5N average of the zonal wind.
